# Supplementary material for: Yukon River incision drove organic carbon burial in the Bering Sea during global climate changes at 2.6 and 1 Ma
Source: Copernicus journal article supplement (doi:10.5194/esurf-10-1041-2022), 2022-10-28
Supplement: Supplementary file 1 [file esurf-10-1041-2022-supplement.zip]

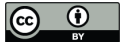

*Supplement of*

**Yukon River incision drove organic carbon burial in the Bering Sea during global climate changes at 2.6 and 1 Ma**

**Adrian M. Bender et al.**

*Correspondence to:* Adrian M. Bender ([abender@usgs.gov](mailto:abender@usgs.gov))

- [esurf-10-1041-2022-supplement-title-page.pdf](#)
- [bender\\_etal\\_2022\\_beringSeaComp\\_IODP\\_U1341.xlsx](#)
- [bender\\_etal\\_2022\\_charley\\_river\\_cosmogenic\\_data.xlsx](#)
- [bender\\_etal\\_2022\\_pCO2\\_compilation.xlsx](#)
- [bender\\_etal\\_2022\\_yukon\\_terraces.xlsx](#)

The copyright of individual parts of the supplement might differ from the article licence.
